# Supplementary material for: Cleavage activates Dispatched for Sonic Hedgehog ligand release
Source: eLife. 2018 Jan 23;7:e31678. doi: 10.7554/eLife.31678 (PMC5811216; doi:10.7554/eLife.31678)
Supplement: Figure 1—source data 1. [file elife-31678-fig1-data1.xlsx]

## Sheet: Sheet1
	densitometry
SM 01Nov2017	#1								surface proteins		intracellular proteins
		surface proteins	intracellular proteins						mDisp175	mDisp30	mDisp175	mDisp30
pixel intensity	mDisp175	207.79	196.84					#1	37.9326	91.1425	62.0674	8.85755
	mDisp30	135.17	216.27					#2	29.3079	66.3104	70.6921	33.6896
								#3	47.7309	89.7877	52.2691	10.2123
conversion	mDisp175	17.21	28.16					#4	41.4244	60.0328	58.5756	39.9672
	mDisp30	89.83	8.73					Avg	39.0989	76.8183	60.9011	23.1817
								SEM	3.84213	7.98727	3.84213	7.98727
%	mDisp175	37.9326	62.0674
	mDisp30	91.1425	8.85755
AT 27Nov2017a	#2
		surface proteins	intracellular proteins
pixel intensity	mDisp175	210.56	190.17
	mDisp30	125.74	174.57
conversion	mDisp175	14.44	34.83
	mDisp30	99.26	50.43
%	mDisp175	29.3079	70.6921
	mDisp30	66.3104	33.6896
	#3
SM 28Nov2017		surface proteins	intracellular proteins
pixel intensity	mDisp175	213.01	211.87
	mDisp30	62.17	206.48
conversion	mDisp175	11.99	13.13
	mDisp30	162.83	18.52
%	mDisp175	47.7309	52.2691
	mDisp30	89.7877	10.2123
AT 4Nov2017	#4
		surface proteins	intracellular proteins
pixel intensity	mDisp175	146.48	113.97
	mDisp30	49.11	107.9
conversion	mDisp175	78.52	111.03
	mDisp30	175.89	117.1
%	mDisp175	41.4244	58.5756
	mDisp30	60.0328	39.9672
