# Supplementary material for: Cleavage activates Dispatched for Sonic Hedgehog ligand release
Source: eLife. 2018 Jan 23;7:e31678. doi: 10.7554/eLife.31678 (PMC5811216; doi:10.7554/eLife.31678)
Supplement: Figure 3—source data 1. [file elife-31678-fig3-data1.xlsx]

## Sheet: Sheet1
	Exp. 87 & 90-15 (A) - Analysis & Graph					NIH3T3 Cells - Furin Inhbitor 1 - Analysis & Graphs
	2017-03-31
						Average Control ratio:
						4.7
		Exp 87-17	Exp 90-17
	Furin Inhibitor 1	mDisp 250	mDisp 250		Relatives	Relatives	Average of Relatives		STD	SEM		mDisp 250	Avg Relatives	Avg %	STD
	0uM	5.07	4.33		1.07872	0.921277	1		0.111332	0.0787234		0uM	1	100	0.111332
	10uM	11.2892	8.46225		2.40196	1.80048	2.10122		0.425311	0.30074		10uM	2.10122	210.122	0.425311
	25uM	11.1165	10.7664		2.36522	2.29072	2.32797		0.0526793	0.0372499		25uM	2.32797	232.797	0.0526793
	50uM	13.2708	14.9371		2.82357	3.1781	3.00083		0.250689	0.177264		50uM	3.00083	300.083	0.250689
	75uM	12.3522	21.951		2.62814	4.67042	3.64928		1.44411	1.02114		75uM	3.64928	364.928	1.44411
	100uM	15.0809	23.6052		3.2087	5.02237	4.11553		1.28246	0.906838		100uM	4.11553	411.553	1.28246
						Average Control ratio:
						33.65
		Exp 87-17	Exp 90-17
	Furin Inhibitor 1	mDisp 175	mDisp 175		Relatives	Relatives	Average of Relatives		STD	SEM		mDisp 175	Avg Relatives	Avg %	STD
	0uM	33.94	33.36		1.00862	0.991382	1		0.0121879	0.00861813		0uM	1	100	0.0121879
	10uM	29.3539	30.8843		0.872331	0.91781	0.895071		0.0321587	0.0227396		10uM	0.895071	89.5071	0.0321587
	25uM	23.9307	33.1896		0.711166	0.986318	0.848742		0.194562	0.137576		25uM	0.848742	84.8742	0.194562
	50uM	25.5876	33.8053		0.760403	1.00461	0.882509		0.172683	0.122106		50uM	0.882509	88.2509	0.172683
	75uM	23.0632	46.2173		0.685385	1.37347	1.02943		0.486551	0.344043		75uM	1.02943	102.943	0.486551
	100uM	25.9651	49.181		0.771623	1.46155	1.11658		0.487849	0.344961		100uM	1.11658	111.658	0.487849
						Average Control ratio:
						26.525
		Exp 87-17	Exp 90-17
	Furin Inhibitor 1	mDisp 145	mDisp 145		Relatives	Relatives	Average of Relatives		STD	SEM		mDisp 145	Avg Relatives	Avg %	STD
	0uM	25.25	27.8		0.951932	1.04807	1		0.0679782	0.0480679		0uM	1	100	0.0679782
	10uM	10.0337	14.7903		0.378275	0.557597	0.467936		0.1268	0.0896609		10uM	0.467936	46.7936	0.1268
	25uM	4.94584	9.00314		0.18646	0.339421	0.26294		0.10816	0.0764806		25uM	0.26294	26.294	0.10816
	50uM	2.72972	6.50316		0.102911	0.245171	0.174041		0.100593	0.0711299		50uM	0.174041	17.4041	0.100593
	75uM	1.62417	6.2587		0.0612317	0.235955	0.148593		0.123548	0.0873616		75uM	0.148593	14.8593	0.123548
	100uM	1.50302	6.22974		0.0566643	0.234863	0.145764		0.126005	0.0890993		100uM	0.145764	14.5764	0.126005
