# Supplementary material for: Cleavage activates Dispatched for Sonic Hedgehog ligand release
Source: eLife. 2018 Jan 23;7:e31678. doi: 10.7554/eLife.31678 (PMC5811216; doi:10.7554/eLife.31678)
Supplement: Figure 4—source data 1. [file elife-31678-fig4-data1.xlsx]

## Sheet: Sheet1
	Exp. 10, 11 & 13, 21-17 (A2) - Analysis & Graph							Disp KO & Light II Cells - mDisp & SHh-FL - Co-Culture Assay								Date: 3-17-2017
								Lipofectamine 3000
	Co-culture: Flexi Perm: Serum Free Media
	Ratio: 1:10 (Disp KO vs Light 2 Cells)
								Average Control ratio:
								0.0109217
		Exp	Exp	Exp	Exp
		10-17	11-17	13-17	21-17		10-17	11-17	13-17	21-17
	(-) SHh-FL	Luc/Rn Ratios	Luc/Rn Ratios	Luc/Rn Ratios	Luc/Rn Ratios		Relatives	Relatives	Relatives	Relatives
1	GFP	0.00949183	0.00999861	0.0110614	0.00989791		0.86908	0.915482	1.01279	0.906261
2		0.00968245	0.0124876	0.0120498	0.0103195		0.886533	1.14338	1.10329	0.944863
3			0.0114876	0.0130101	0.0106518			1.05182	1.19121	0.975287
4	mDisp WT	0.00937881	0.00987092	0.0114563	0.0097752		0.858732	0.90379	1.04895	0.895026
5		0.00901745	0.00894154	0.0116365	0.0112296		0.825645	0.818695	1.06545	1.02819
6			0.009366	0.0123674	0.0118269			0.857558	1.13237	1.08288
7	mDisp CS	0.00839924	0.00874835	0.0134325	0.00860673		0.769042	0.801007	1.22989	0.788039
8		0.00891019	0.00539927	0.0115813	0.0101762		0.815824	0.494362	1.06039	0.931744
9			0.00676429	0.0119569	0.0103601			0.619344	1.09478	0.948575
10	mDisp TM4/TM10	0.00954568	0.0107926	0.0112737	0.00936387		0.874011	0.98818	1.03223	0.857364
11		0.00915913	0.0107039	0.0108926	0.00978084		0.838618	0.98006	0.997337	0.895542
12			0.0126211	0.00955046	0.00960994			1.1556	0.874448	0.879894
								Average Control ratio:
								0.0135268
		Exp	Exp	Exp	Exp
		10-17	11-17	13-17	21-17		10-17	11-17	13-17	21-17
	(+) SHh-FL	Luc/Rn Ratios	Luc/Rn Ratios	Luc/Rn Ratios	Luc/Rn Ratios		Relatives	Relatives	Relatives	Relatives
13	GFP	0.0113892		0.0154356	0.0136781		0.841974		1.14111	1.01119
14		0.0106041	0.0146495	0.0142413	0.0145797		0.783933	1.083	1.05282	1.07784
15			0.0126276	0.0143167	0.0137462			0.933526	1.0584	1.01622
16	mDisp WT	0.017429	0.0260824		0.0195138		1.28847	1.9282		1.4426
17		0.0165344	0.0306392	0.0212217	0.0240096		1.22234	2.26507	1.56886	1.77496
18			0.01906	0.0200709				1.40905	1.48378
19	mDisp CS	0.0117724	0.00945994	0.0158489	0.0131112		0.870298	0.699347	1.17166	0.969274
20		0.011763	0.012432	0.0165767	0.0132382		0.869604	0.919063	1.22547	0.978664
21			0.0174504	0.0191481	0.0125884			1.29006	1.41557	0.930627
22	mDisp TM4/TM10	0.011166		0.011208	0.0109864		0.825471		0.828577	0.812196
23		0.0100167	0.0145201	0.0111268	0.0128419		0.740504	1.07343	0.822574	0.949367
24			0.0133592	0.0129399	0.0117329			0.987609	0.956613	0.867383
		1) Take average of all experiments for Control (0ng).
		2) Each Luc/Rn ration divide by average ratio of Control for all samples.
		3) Gives relative fold change for each one.
		4) Take average of fold change for each sample set. This is what is graphed.
		5) Calculate the SEM for each sample set from the relative fol change values.
