# Supplementary material for: Cleavage activates Dispatched for Sonic Hedgehog ligand release
Source: eLife. 2018 Jan 23;7:e31678. doi: 10.7554/eLife.31678 (PMC5811216; doi:10.7554/eLife.31678)
Supplement: Figure 4—source data 2. [file elife-31678-fig4-data2.xlsx]

## Sheet: Sheet1
	Exp 96-16 (A) (Histogram - Photoshop)					mDisp WT vs CS, Shh & Scube2												Date:	2017-04-06
	Disp KO Stables (Shh)					Densitometry on Shh Media Samples
	Bands Inverted
	A) Empty - Media Input - Shh Band							D) Empty - Coomassie - Media - Top Band
			Background							Background
		Peak Intensity	Subtraction	Shh	Scube2				Peak Intensity	Subtraction	Shh	Scube2		WT - Media Normalization				G) Empty Input - Shh Band - Normalization
	1	61.33	2.1	(-)	0ng			1	107.74	36.655	(-)	0ng		1
	2	66.37	7.14	(+)	0ng			2	106.95	35.865	(+)	0ng		1.02203				GFP	Peak Intensity	Normalization	Fraction	Percentage
	3	63.73	4.5	(+)	500ng			3	109.87	38.785	(+)	500ng		0.945082				(-) Shh, (0ng) Scube2	2.1	2.1	1	100
	4	63.11	3.88	(+)	1000ng			4	106.6	35.515	(+)	1000ng		1.0321				(+) Shh, (0ng) Scube2	7.14	7.29727	3.47489	347.489
	5	73.3	14.07	(+)	2000ng			5	110.76	39.675	(+)	2000ng		0.923882				(+) Shh, (500ng) Scube2	4.5	4.25287	2.02518	202.518
																		(+) Shh, (1000ng) Scube2	3.88	4.00454	1.90693	190.693
	6	58.99	N/A	Blank	Avg			6	70.41	N/A	Blank	Avg						(+) Shh, (2000ng) Scube2	14.07	12.999	6.19001	619.001
	7	59.47	N/A	Blank	59.23			7	71.76	N/A	Blank	71.085
	B) mDispatched WT - Media Input - Shh Band							E) mDispatched WT - Coomassie - Media - Top Band										H) WT Input - Shh Band - Normalization
			Background							Background
		Peak Intensity	Subtraction	Shh	Scube2				Peak Intensity	Subtraction	Shh	Scube2		WT - Media Normalization				Disp WT	Peak Intensity	Normalization	Fraction	Percentage
	1	60.83	1.6	(-)	0ng			1	106.49	35.405	(-)	0ng		1				(-) Shh, (0ng) Scube2	1.6	1.6	1	100
	2	74.46	15.23	(+)	0ng			2	108.22	37.135	(+)	0ng		0.953413				(+) Shh, (0ng) Scube2	15.23	14.5205	9.0753	907.53
	3	99.09	39.86	(+)	500ng			3	111.3	40.215	(+)	500ng		0.880393				(+) Shh, (500ng) Scube2	39.86	35.0925	21.9328	2193.28
	4	129.86	70.63	(+)	1000ng			4	109.99	38.905	(+)	1000ng		0.910037				(+) Shh, (1000ng) Scube2	70.63	64.2759	40.1725	4017.25
	5	106.68	47.45	(+)	2000ng			5	109.64	38.555	(+)	2000ng		0.918299				(+) Shh, (2000ng) Scube2	47.45	43.5733	27.2333	2723.33
	6	58.99	N/A	Blank	Avg			6	70.41	N/A	Blank	Avg
	7	59.47	N/A	Blank	59.23			7	71.76	N/A	Blank	71.085
	C) mDispatched CS - Media Input - Shh Band							F) mDispatched CS - Coomassie - Media - Top Band										I) CS Input - Shh Band - Normalization
			Background							Background
		Peak Intensity	Subtraction	Shh	Scube2				Peak Intensity	Subtraction	Shh	Scube2		CS - Media Normalization				Disp CS	Peak Intensity	Normalization	Fraction	Percentage
	1	61.01	1.78	(-)	0ng			1	107.4	36.315	(-)	0ng		1				Control	1.78	1.78	1	100
	2	61.94	2.71	(+)	0ng			2	103	31.915	(+)	0ng		1.13787				Shh	2.71	3.08362	1.73237	173.237
	3	61.13	1.9	(+)	500ng			3	91.9	20.815	(+)	500ng		1.74466				Shh + 1x Scube2	1.9	3.31485	1.86227	186.227
	4	63.05	3.82	(+)	1000ng			4	93.76	22.675	(+)	1000ng		1.60154				Shh + 2x Scube2	3.82	6.1179	3.43702	343.702
	5	65.08	5.85	(+)	2000ng			5	88.64	17.555	(+)	2000ng		2.06864				Shh + 4x Scube2	5.85	12.1016	6.79862	679.862
	6	58.99	N/A	Blank	Avg			6	70.41	N/A	Blank	Avg
	7	59.47	N/A	Blank	59.23			7	71.76	N/A	Blank	71.085
	Note: Peak Intensity = Pixel Mean
