# Supplementary material for: Cleavage activates Dispatched for Sonic Hedgehog ligand release
Source: eLife. 2018 Jan 23;7:e31678. doi: 10.7554/eLife.31678 (PMC5811216; doi:10.7554/eLife.31678)
Supplement: Figure 4—source data 3. [file elife-31678-fig4-data3.xlsx]

## Sheet: Experiment 1
	Exp 103-17 (D) Media (Histogram - Photoshop)					mDisp WT - CRISPR/CAS9 PCSK - WT vs Furin KO												Date:	2018-01-09
	CRISPR/CAS9 Clone Set #2					Densitometry on Shh Media Samples
	Bands Inverted
	A) WT MEFs - Media Input - Shh Band							C) WT MEFs - Coomassie - Media - Band at 100 kDa						Media divided by Coomassie				E) WT MEFs Input - Shh Band - Normalization
			Background							Background
		Peak Intensity	Subtraction	Shh					Peak Intensity	Subtraction	Shh			WT - Media Normalization				WT MEFs	Normalization	Fraction	Percentage
	1	76.88	23.575	(+)	GFP			1	140.84	112.155	(+)	GFP		0.2102				GFP + Shh	0.2102	1	100
	2	127.39	74.085	(+)	WT			2	154.78	126.095	(+)	WT		0.587533				WT + Shh	0.587533	2.79511	279.511
	4	53.22	N/A	Blank	Avg			4	29.21	N/A	Blank	Avg
	5	53.39	N/A	Blank	53.305			5	28.16	N/A	Blank	28.685
	B) Furin KO - Media Input - Shh Band							D) Furin KO - Coomassie - Media - Band at 100 kDa										F) Furin KO Input - Shh Band - Normalization
			Background							Background
		Peak Intensity	Subtraction	Shh					Peak Intensity	Subtraction	Shh			Furin KO- Media Normalization				Furin KO MEFs	Normalization	Fraction	Percentage
	1	63.54	10.235	(+)	GFP			1	122.66	93.975	(+)	GFP		0.108912				GFP + Shh	0.108912	0.518134	51.8134
	2	71.34	18.035	(+)	WT			2	122.48	93.795	(+)	WT		0.192281				WT + Shh	0.192281	0.914752	91.4752
	4	53.22	N/A	Blank	Avg			4	29.21	N/A	Blank	Avg
	5	53.39	N/A	Blank	53.305			5	28.16	N/A	Blank	28.685
	Note: Peak Intensity = Pixel Mean
	Exp 103-17 (E) Lysate - (Histogram - Photoshop)					mDisp WT - CRISPR/CAS9 PCSK - WT vs Furin KO
	CRISPR/CAS9 Clone Set #2					Densitometry on Shh Lysate Samples
	Bands Inverted
	A) WT MEFs - Lysate Input - Shh Band - Band							C) WT MEFs - Actin - Lysate						Lysate divided by Actin				E) WT MEFs Input - Shh Band - Normalization
		Top	Background							Background
		Peak Intensity	Subtraction	Shh					Peak Intensity	Subtraction	Shh			WT - Lysate Normalization				WT MEFs	Normalization	Fraction	Percentage
	1	72.22	24.02	(+)	GFP			1	61.72	17.795	(+)	GFP		1.34982				GFP + Shh	1.34982	1	100
	2	90.07	41.87	(+)	WT			2	60.88	16.955	(+)	WT		2.46948				WT + Shh	2.46948	1.82949	182.949
	4	48.29	N/A	Blank	Avg			4	43.42	N/A	Blank	Avg
	5	48.11	N/A	Blank	48.2			5	44.43	N/A	Blank	43.925
	B) Furin KO - Lysate Input - Shh Band							D) Furin KO - Actin - Lysate										F) Furin KO Input - Shh Band - Normalization
		Top	Background							Background
		Peak Intensity	Subtraction	Shh					Peak Intensity	Subtraction	Shh			Furin KO - Lysate Normalization				Furin KO MEFs	Normalization	Fraction	Percentage
	1	64.19	15.99	(+)	GFP			1	60.35	16.425	(+)	GFP		0.973516				GFP + Shh	0.973516	0.721221	72.1221
	2	79.46	31.26	(+)	WT			2	60.75	16.825	(+)	WT		1.85795				WT + Shh	1.85795	1.37645	137.645
	4	48.29	N/A	Blank	Avg			4	43.42	N/A	Blank	Avg
	5	48.11	N/A	Blank	48.2			5	44.43	N/A	Blank	43.925
	Note: Peak Intensity = Pixel Mean

## Sheet: Experiment 2
	Exp 108-17 (D) Media (Histogram - Photoshop)					mDisp WT - CRISPR/CAS9 PCSK - WT vs Furin KO												Date:	2018-01-08
	CRISPR/CAS9 Clone Set #2					Densitometry on Shh Media Samples
	Bands Inverted
	A) WT MEFs - Media Input - Shh Band							C) WT MEFs - Coomassie - Media - Band at 100 kDa						Media divided by Coomassie				E) WT MEFs Input - Shh Band - Normalization
			Background							Background
		Peak Intensity	Subtraction	Shh					Peak Intensity	Subtraction	Shh			WT - Media Normalization				WT MEFs	Normalization	Fraction	Percentage
	1	109.57	57	(+)	GFP			1	130.36	55.535	(+)	GFP		1.02638				GFP + Shh	1.02638	1	100
	2	151.19	98.62	(+)	WT			2	133.66	58.835	(+)	WT		1.67621				WT + Shh	1.67621	1.63313	163.313
	4	51.97	N/A	Blank	Avg			4	75.98	N/A	Blank	Avg
	5	53.17	N/A	Blank	52.57			5	73.67	N/A	Blank	74.825
	B) Furin KO - Media Input - Shh Band							D) Furin KO - Coomassie - Media - Band at 100 kDa										F) Furin KO Input - Shh Band - Normalization
			Background							Background
		Peak Intensity	Subtraction	Shh					Peak Intensity	Subtraction	Shh			Furin KO- Media Normalization				Furin KO MEFs	Normalization	Fraction	Percentage
	1	95.2	42.63	(+)	GFP			1	131.14	56.315	(+)	GFP		0.756992				GFP + Shh	0.756992	0.737536	73.7536
	2	98.05	45.48	(+)	WT			2	125.67	50.845	(+)	WT		0.894483				WT + Shh	0.894483	0.871493	87.1493
	4	51.97	N/A	Blank	Avg			4	75.98	N/A	Blank	Avg
	5	53.17	N/A	Blank	52.57			5	73.67	N/A	Blank	74.825
	Note: Peak Intensity = Pixel Mean
	Exp 108-17 (E) Lysate - (Histogram - Photoshop)					mDisp WT - CRISPR/CAS9 PCSK - WT vs Furin KO
	CRISPR/CAS9 Clone Set #2					Densitometry on Shh Lysate Samples
	Bands Inverted
	A) WT MEFs - Lysate Input - Shh Band							C) WT MEFs - Actin - Lysate						Lysate divided by Actin				E) WT MEFs Input - Shh Band - Normalization
		Top	Background							Background
		Peak Intensity	Subtraction	Shh					Peak Intensity	Subtraction	Shh			WT - Lysate Normalization				WT MEFs	Normalization	Fraction	Percentage
	1	80.4	28.96	(+)	GFP			1	83.32	38.585	(+)	GFP		0.750551				GFP + Shh	0.750551	1	100
	2	85.55	34.11	(+)	WT			2	82.95	38.215	(+)	WT		0.892581				WT + Shh	0.892581	1.18924	118.924
	4	52.04	N/A	Blank	Avg			4	44.67	N/A	Blank	Avg
	5	50.84	N/A	Blank	51.44			5	44.8	N/A	Blank	44.735
	B) Furin KO - Lysate Input - Shh Band							D) Furin KO - Actin - Lysate										F) Furin KO Input - Shh Band - Normalization
		Top	Background							Background
		Peak Intensity	Subtraction	Shh					Peak Intensity	Subtraction	Shh			Furin KO - Lysate Normalization				Furin KO MEFs	Normalization	Fraction	Percentage
	1	83.43	31.99	(+)	GFP			1	79.81	35.075	(+)	GFP		0.912046				GFP + Shh	0.912046	1.21517	121.517
	2	107.2	55.76	(+)	WT			2	80.01	35.275	(+)	WT		1.58072				WT + Shh	1.58072	2.10608	210.608
	4	52.04	N/A	Blank	Avg			4	44.67	N/A	Blank	Avg
	5	50.84	N/A	Blank	51.44			5	44.8	N/A	Blank	44.735
	Note: Peak Intensity = Pixel Mean

## Sheet: Final Analysis
	Exp 103 & 108-17 (Histogram - Photoshop)				mDisp WT - CRISPR/CAS9 PCSK - WT vs Furion KO					Date:	2018-01-09
	CRISPR/CAS9 Clone Set #1 & #2				Densitometry on Shh Lysate & Media Samples
	Bands Inverted
	Exp 103-17	Clone Set #1
	Media
	WT MEFs Input - Shh Media - Normalization					WT MEFs Input - Lysate - Shh Band - Normalization					Media/Lysate
											Fraction
	WT MEFs	Normalization	Fraction	Percentage		WT MEFs	Normalization	Fraction	Percentage
	GFP + Shh	0.2102	1	100		GFP + Shh	1.34982	1	100		1
	WT + Shh	0.587533	2.79511	279.511		WT + Shh	2.46948	1.82949	182.949		1.52781
	Furin KO - Shh Media - Normalization					Furin KO - Lysate - Shh Band - Normalization					Media/Lysate
											Fraction
	Furin KO MEFs	Normalization	Fraction	Percentage		Furin KO MEFs	Normalization	Fraction	Percentage
	GFP + Shh	0.108912	0.518134	51.8134		GFP + Shh	0.973516	0.721221	72.1221		0.718413
	WT + Shh	0.192281	0.914752	91.4752		WT + Shh	1.85795	1.37645	137.645		0.664576
	Exp 108-17	Clone Set #2
	Media					Lysate
	WT MEFs Input - Shh Media - Normalization					WT MEFs Input - Lysate - Shh Band - Normalization					Media/Lysate
											Fraction
	WT MEFs	Normalization	Fraction	Percentage		WT MEFs	Normalization	Fraction	Percentage
	GFP + Shh	1.02638	1	100		GFP + Shh	0.750551	1	100		1
	WT + Shh	1.67621	1.63313	163.313		WT + Shh	0.892581	1.18924	118.924		1.37326
	Furin KO - Shh Media - Normalization					Furin KO - Lysate - Shh Band - Normalization					Media/Lysate
											Fraction
	Furin KO MEFs	Normalization	Fraction	Percentage		Furin KO MEFs	Normalization	Fraction	Percentage
	GFP + Shh	0.756992	0.737536	73.7536		GFP + Shh	0.912046	1.21517	121.517		0.606941
	WT + Shh	0.894483	0.871493	87.1493		WT + Shh	1.58072	2.10608	210.608		0.413798
