# Supplementary material for: Cleavage activates Dispatched for Sonic Hedgehog ligand release
Source: eLife. 2018 Jan 23;7:e31678. doi: 10.7554/eLife.31678 (PMC5811216; doi:10.7554/eLife.31678)
Supplement: Figure 6—source data 1. [file elife-31678-fig6-data1.xls]

## Sheet: Sheet1
	Luc/Rn
date	5.20.16		6.12.16		6.16.16
	Exp 1		Exp 2		Exp 3		average	t test
Control	0.34	0.412	0.129	0.131	0.254	0.24	0.251	1.95833e-06
Hh	0.93	1.07	1.04	0.96	1.07	0.934	1.00067
Hh + N1	0.729	0.86	1.08	0.792	1.36	0.824	0.940833	0.406822
Hh + N2	0.824	0.793	0.738	0.68	0.998	1.16	0.8655	0.0503282
Hh + N3	0.615	0.58	1.02	0.63	0.904	0.59	0.723167	0.00260137
Hh + WT Disp	2.36	2.7	1.57	1.54	2.27	2.06	2.08333	0.00191946
